# Supplementary material for: Large-Scale Screening of 239 Traditional Chinese Medicinal Plant Extracts for Their Antibacterial Activities against Multidrug-Resistant Staphylococcus aureus and Cytotoxic Activities
Source: PubMed Central journal article supplement (PMC7157549; doi:10.3390/pathogens9030185), 2020-03-04
Supplement: pathogens-09-00185-s001.pdf [file pathogens-09-00185-s001.pdf]

**Table S1.** Screening 239 TCMP extracts for antibacterial activities against reference *S. aureus* ATCC 25923 and antibiotic-resistant *S. aureus* SJTUF 20827 based on diameter inhibition zone (DIZ, mm).

|    | Family        | Scientific Name                                       | Common Name               | Extracted Plant Part | DIZ (mm)         |             |
|----|---------------|-------------------------------------------------------|---------------------------|----------------------|------------------|-------------|
|    |               |                                                       |                           |                      | <i>S. aureus</i> |             |
|    |               |                                                       |                           |                      | ATCC 25923       | SJTUF 20827 |
| 1  | Acanthaceae   | <i>Andrographis paniculata</i> Nees                   | Green chireta             | aerial part          | 8.4 ± 0.5        | 9.9 ± 0.3   |
| 2  | Acoraceae     | <i>Acorus tatarinowii</i> Schott                      | Grassleaf sweelflag       | rhizome              | 9.5 ± 0.5        | 8.3 ± 0.2   |
| 3  | Anacardiaceae | <i>Rhus chinensis</i> Mill.                           | Nutgall tree              | gall                 | 22 ± 0.5         | 20 ± 0.4    |
| 4  |               | <i>Achyranthes aspera</i> L.                          | Chaffbur                  | aerial part          | NIZ              | NIZ         |
| 5  | Amaranthaceae | <i>Gomphrena globosa</i> L.                           | Common globe amaranth     | flower               | 8.1 ± 0.1        | 8.1 ± 0.3   |
| 6  |               | <i>Kochia scoparia</i> (L.) Schrad.                   | Fireweed                  | fruit                | 11.2 ± 0.5       | 11.8 ± 0.4  |
| 7  |               | <i>Bupleurum chinense</i> DC.                         | Chinese throughwax        | root                 | NIZ              | NIZ         |
| 8  |               | <i>Cnidium monnieri</i> Cusson                        | Monnier's snowparsley     | fruit                | 14 ± 0.1         | NIZ         |
| 9  |               | <i>Ferula sinkiangensis</i> K. M. Shen                | Resina ferulae            | resin                | 8.1 ± 0.2        | NIZ         |
| 10 |               | <i>Foeniculum vulgare</i> Mill.                       | Fennel                    | fruit                | NIZ              | NIZ         |
| 11 |               | <i>Glehnia littoralis</i> F.Schmidt ex Miq.           | American silvertop        | root                 | 8.2 ± 0.3        | NIZ         |
| 12 | Apiaceae      | <i>Hydrocotyle sibthorpioides</i> Lam.                | Lawn marshpennywort       | aerial part          | 11.3 ± 0.1       | 8.5 ± 0.1   |
| 13 |               | <i>Ligusticum sinense</i> Oliv.                       | Sichuan lovage            | rhizome              | 10.6 ± 0.2       | 9.2 ± 0.4   |
| 14 |               | <i>Notopterygium forbesii</i> H.Boiss.                | Notopterygium             | rhizome & root       | 10.9             | 9.3 ± 0.5   |
| 15 |               | <i>Peucedanum praeruptorum</i> Dunn                   | Peucedanum                | root                 | NIZ              | 8.4 ± 0.2   |
| 16 |               | <i>Saposhnikovia divaricata</i> (Turcz.) Schischk.    | Siler                     | root                 | NIZ              | NIZ         |
| 17 |               | <i>Cynanchum atratum</i> Bunge                        | Blackend Swallowwort      | rhizome              | NIZ              | 8.1 ± 0.5   |
| 18 |               | <i>Cynanchum glaucescens</i> (Decne.) Handel-Mazzetti | Willowleaf swallowwort    | rhizome & root       | NIZ              | 8.5 ± 0.3   |
| 19 | Apocynaceae   | <i>Trachelospermum jasminoides</i> Lem.               | Chinese star-jessamine    | leaf & stem          | 12.5 ± 0.3       | 10.2 ± 0.5  |
| 20 |               | <i>Cynanchum paniculatum</i> (Bunge) Kitagawa         | Radix cynanchi paniculati | rhizome              | 11 ± 0.1         | 10 ± 0.6    |
| 21 |               | <i>Ilex pubescens</i> Hook. & Arn.                    | Pubescent holly           | root                 | 13.3 ± 0.3       | 13.5 ± 0.3  |
| 22 | Aquifoliaceae | <i>Ilex rotunda</i> Thunb.                            | Kurogane holly            | bark                 | 22.4 ± 0.2       | 20.7 ± 0.8  |
| 23 |               | <i>Homalomena occulta</i> Schott                      | Rhizoma homalomenae       | rhizome              | NIZ              | NIZ         |
| 24 |               | <i>Pinellia ternata</i> (Thunb. ex Murray) T.Makino   | Pinellia                  | tuberous root        | NIZ              | 8.1 ± 0.1   |
| 25 | Araceae       | <i>Scindapsus aureus</i> (Linden & André) Engl.       | Golden pothos             | flower               | 8.9 ± 0.1        | 8.7 ± 0.1   |
| 26 |               | <i>Spirodela polyrrhiza</i> (L.) Schleid.             | Common duckweed           | aerial part          | 10.9 ± 0.1       | 15          |
| 27 |               | <i>Aralia chinensis</i> L.                            | Chinese angelica tree     | bark                 | 11.4 ± 0.7       | 9.7 ± 0.1   |
| 28 | Araliaceae    | <i>Panax ginseng</i> C.A.Mey.                         | Asian ginseng             | root                 | NIZ              | NIZ         |
| 29 |               | <i>Panax notoginseng</i> (Burkill) F.H.Chen           | South China ginseng       | root                 | NIZ              | NIZ         |
| 30 | Arecaceae     | <i>Daemonorops draco</i> (Willd.) Blume               | Dragon's blood            | resin                | NIZ              | NIZ         |

|    |                  |                                                   |                         |                    |            |            |
|----|------------------|---------------------------------------------------|-------------------------|--------------------|------------|------------|
| 31 | Aristolochiaceae | <i>Asarum heterotropoides</i> F.Schmidt           | Manchurian wildginge    | rhizome and root   | 12.7       | 14.7 ± 0.4 |
| 32 |                  | <i>Anemarrhena asphodeloides</i> Bunge            | Rhizoma anemarrhena     | tuberous root      | NIZ        | NIZ        |
| 33 | Asparagaceae     | <i>Asparagus cochinchinensis</i> Merr.            | Chinese asparagus       | tuberous root      | 8.2 ± 0.5  | NIZ        |
| 34 |                  | <i>Ophiopogon japonicus</i> Ker Gawl.             | Dwarf lilyturf          | tuberous root      | NIZ        | 8.2 ± 0.3  |
| 35 |                  | <i>Polygonatum cyrtoneura</i> Hua                 | Rhizoma polygonati      | rhizome            | NIZ        | NIZ        |
| 36 | Asphodelaceae    | <i>Aloe ferox</i> Mill.                           | Cape aloe               | dried gel          | 15.2 ± 0.5 | 11.6 ± 0.3 |
| 37 |                  | <i>Hemerocallis citrina</i> Baroni                | Citron daylily          | aerial part        | 13.4 ± 0.1 | 11.1 ± 0.4 |
| 38 |                  | <i>Arctium lappa</i> L.                           | Burdock                 | fruit              | 8.8 ± 0.3  | 8.2 ± 0.4  |
| 39 |                  | <i>Artemisia argyi</i> H.Lév. & Vaniot            | Chinese mugwort         | leaf               | 12.9 ± 0.2 | 12 ± 0.3   |
| 40 |                  | <i>Artemisia capillaris</i> Thunb.                | Capillary artemisia     | aerial part        | 9.8 ± 0.1  | NIZ        |
| 41 |                  | <i>Artemisia scoparia</i> Waldst. & Kit.          | Redstem wormwood        | aerial part        | 11.6 ± 0.3 | 9.2 ± 0.7  |
| 42 |                  | <i>Bidens bipinnata</i> L.                        | Spanish needles         | aerial part        | NIZ        | 8.9 ± 0.2  |
| 43 |                  | <i>Centipeda minima</i> A.Braun & Asch.           | Spreading sneezeweed    | aerial part        | 11.5 ± 0.3 | 9.8 ± 0.2  |
| 44 |                  | <i>Chrysanthemum indicum</i> L.                   | Indian chrysanthemum    | flower             | 13.8 ± 0.3 | 9.5 ± 0.5  |
| 45 |                  | <i>Eclipta prostrata</i> (L.) L.                  | Eclipta                 | aerial part        | 13.1 ± 0.2 | 13.3 ± 0.2 |
| 46 |                  | <i>Elephantopus scaber</i> L.                     | Cucha cara              | aerial part        | 13.8 ± 0.6 | 14.6 ± 0.2 |
| 47 | Asteraceae       | <i>Emilia sonchifolia</i> (L.) DC.                | Lilac tasselflower      | aerial part        | 8.9 ± 0.6  | NIZ        |
| 48 |                  | <i>Eupatorium fortunei</i> Turcz.                 | Chinese eupatorium      | aerial part        | 8.1 ± 0.3  | 8.2 ± 0.3  |
| 49 |                  | <i>Hemistepta lyrata</i> Bunge                    | Lyre-shape hemistepta   | aerial part        | 14.1 ± 0.2 | 12.4       |
| 50 |                  | <i>Inula helenium</i> L.                          | Elecampane              | root               | 11.8 ± 0.2 | 10.8 ± 0.4 |
| 51 |                  | <i>Inula japonica</i> Thunb.                      | Inula flower            | flower (capitulum) | 21 ± 1     | 22v± 1     |
| 52 |                  | <i>Kalimeris indica</i> (L.) Sch.Bip.             | Indian aster            | aerial part        | 11.3 ± 0.4 | NIZ        |
| 53 |                  | <i>Rhaponticum uniflorum</i> DC.                  | Radix rhapontici        | root               | 10 ± 0.4   | 11 ± 0.2   |
| 54 |                  | <i>Senecio scandens</i> (L.) Buch.-Ham.           | Climbing groundsel herb | aerial part        | NIZ        | 8.2 ± 0.3  |
| 55 |                  | <i>Xanthium sibiricum</i> Patrín                  | Herba xanthii           | aerial part        | 8.1 ± 0.3  | 9.2 ± 0.4  |
| 56 |                  | <i>Codonopsis pilosula</i> Nannf.                 | Bellflower              | root               | 8.2 ± 0.3  | 8.4 ± 0.1  |
| 57 | Balsaminaceae    | <i>Impatiens balsamina</i> L.                     | Balsam                  | seed               | NIZ        | 12.3 ± 0.3 |
| 58 | Berberidaceae    | <i>Leontice kiangnanensis</i> P.L.Chiu            | Rhizoma corydalis       | tuberous root      | 20.5 ± 0.9 | 21.6 ± 0.3 |
| 59 |                  | <i>Mahonia fortunei</i> (Lindl.) Fedde            | Fortune mahonia         | leaf               | 11.3 ± 0.3 | 10.9 ± 0.3 |
| 60 | Bignoniaceae     | <i>Campsis grandiflora</i> K.Schum.               | Chinese trumpet-creeper | flower             | NIZ        | NIZ        |
| 61 |                  | <i>Oroxylum indicum</i> Vent.                     | Indian trumpet flower   | seed               | 21.5 ± 0.5 | 19.4 ± 0.5 |
| 62 | Boraginaceae     | <i>Lithospermum erythrorhizon</i> Siebold & Zucc. | Purple gromwell         | leaf               | 13         | 14.5 ± 0.6 |
| 63 |                  | <i>Brassica juncea</i> (L.) Czern.                | Chinese mustard         | seed               | NIZ        | NIZ        |
| 64 | Brassicaceae     | <i>Isatis indigotica</i> Fortune                  | Woad                    | root               | 8.1 ± 0.2  | 8.6 ± 0.5  |
| 65 |                  | <i>Isatis tinctoria</i> L.                        | Dyer's woad             | leaf               | 25 ± 2     | 22.4 ± 0.1 |
| 66 |                  | <i>Raphanus sativus</i> L.                        | Garden radish           | seed               | 8.4 ± 0.4  | NIZ        |
| 67 | Burseraceae      | <i>Commiphora myrrha</i> Engl.                    | Myrrh                   | resin              | 9 ± 0.2    | 9.5 ± 0.2  |

|     |                 |                                                              |                                |                    |            |            |
|-----|-----------------|--------------------------------------------------------------|--------------------------------|--------------------|------------|------------|
| 68  | Buxaceae        | <i>Buxus sinica</i> (Rehder & E.H.Wilson) M.Cheng            | Chinese boxwood                | leaf & branch      | 10.2 ± 0.5 | 9.6 ± 0.2  |
| 69  | Cannabaceae     | <i>Humulus scandens</i> (Lour.) Merr.                        | Japanese hop                   | leaf & stem        | 8.8 ± 0.3  | NIZ        |
| 70  | Campanulaceae   | <i>Platycodon grandiflorus</i> A.DC.                         | Balloon flower                 | root               | NIZ        | 8.2 ± 0.1  |
| 71  |                 | <i>Dipsacus japonicus</i> Miq.                               | Japanese teasel                | root               | NIZ        | 8.4 ± 0.2  |
| 72  | Caprifoliaceae  | <i>Lonicera japonica</i> Thunb.                              | Chinese honeysuckle            | branch             | 9.3 ± 0.1  | 8.7 ± 0.2  |
| 73  |                 | <i>Lonicera maackii</i> (Rupr.) Maxim.                       | Amur honeysuckle               | flower             | 8.6        | NIZ        |
| 74  |                 | <i>Patrinia scabiosifolia</i> Fisch.                         | Herba patriniae                | aerial part        | 11.5 ± 0.5 | NIZ        |
| 75  | Caryophyllales  | <i>Vaccaria hispanica</i> (Miller) Rauschert                 | Cowcockle                      | seed               | 8.5 ± 0.3  | NIZ        |
| 76  | Celastraceae    | <i>Euonymus fortunei</i> (Turcz.) Hand.-Mazz.                | Climbing euonymus              | leaf and stem      | 10.9 ± 0.4 | 11.4 ± 0.1 |
| 77  | Chloranthaceae  | <i>Sarcandra glabra</i> (Thunb.) Nakai                       | Herba sarcandrae               | branch             | 11.9 ± 0.1 | 8.2 ± 0.3  |
| 78  | Cibotiaceae     | <i>Cibotium barometz</i> (L.) J.Sm.                          | Scythian-lamb                  | rhizome            | 11.3 ± 0.2 | NIZ        |
| 79  | Convolvulaceae  | <i>Dichondra repens</i> J.R.Forst. & G.Forst.                | Dichondra                      | aerial part        | 13.5 ± 0.3 | 12 ± 2     |
| 80  | Combretaceae    | <i>Quisqualis indica</i> L.                                  | Rangoon creeper                | fruit              | NIZ        | NIZ        |
| 81  |                 | <i>Terminalia chebula</i> Retz.                              | Myrobalan                      | Fruit              | 21.6 ± 0.7 | 22 ± 1     |
| 82  | Crassulaceae    | <i>Sedum sarmentosum</i> Bunge                               | Stringy stonecrop              | aerial part        | NIZ        | NIZ        |
| 83  |                 | <i>Momordica grosvenorii</i> Swingle                         | Buddhafruit                    | fruit              | NIZ        | 8.8 ± 0.2  |
| 84  | Cucurbitaceae   |                                                              |                                | root               | 9.1 ± 0.2  | NIZ        |
| 85  |                 | <i>Trichosanthes kirilowii</i> Maxim.                        | Chinese snake gourd            | fruit              | NIZ        | NIZ        |
| 86  |                 |                                                              |                                | fruit peel         | 8.3 ± 0.2  | 8.4 ± 0.1  |
| 87  | Dioscoreaceae   | <i>Dioscorea bulbifera</i> L.                                | aerial yam                     | tuberous root      | 22 ± 1     | 18.5 ± 0.2 |
| 88  |                 | <i>Dioscorea hypoglauca</i> Palib.                           | Mountain yam                   | rhizome            | 8.2 ± 0.1  | 8.2 ± 0.1  |
| 89  | Dryopteridaceae | <i>Dryopteris crassirhizoma</i> Nakai                        | Japanese flowering fern        | rhizome            | 8.1 ± 0.3  | NIZ        |
| 90  | Ebenaceae       | <i>Diospyros kaki</i> Thunb.                                 | Chinese persimmon              | calyx              | 18 ± 1     | 13 ± 2     |
| 91  | Elaeagnaceae    | <i>Elaeagnus pungens</i> Thunb.                              | Spiny oleaster                 | leaf               | 10.1 ± 0.4 | 12.3 ± 0.2 |
| 92  | Ericaceae       | <i>Pyrola calliantha</i> Andres                              | Chinese pyrola                 | aerial part        | 14.5 ± 0.2 | 14.7 ± 0.4 |
| 93  |                 | <i>Euphorbia helioscopia</i> L.                              | Summer spurge                  | aerial part        | 13.7 ± 0.2 | 10.8 ± 0.6 |
| 94  | Euphorbiaceae   | <i>Euphorbia hirta</i> L.                                    | Garden spurge                  | aerial part        | 13.4 ± 0.2 | 10 ± 0.3   |
| 95  |                 | <i>Euphorbia humifusa</i> Willd.                             | Herba euphorbiae humifusae     | aerial part        | 14.1 ± 0.4 | 13.2 ± 0.2 |
| 96  |                 | <i>Speranskia tuberculata</i> Baill.                         | Herba speranskiae tuberculatae | aerial part        | 27 ± 1     | 25 ± 1     |
| 97  |                 | <i>Acacia catechu</i> (L.f.) Willd.                          | Catechu                        | branch             | 24.5 ± 0.5 | 19.8 ± 0.9 |
| 98  |                 | <i>Albizia julibrissin</i> Durazz.                           | Silk tree                      | flower             | 8.6 ± 0.4  | NIZ        |
| 99  |                 |                                                              |                                | bark               | 8.7 ± 0.4  | 11.1 ± 0.7 |
| 100 | Fabaceae        | <i>Caesalpinia minax</i> Hance                               | Semen caesalpiniae             | seed               | 12.1 ± 0.2 | 9.7 ± 0.4  |
| 101 |                 | <i>Cassia occidentalis</i> L.                                | Coffee senna                   | seed               | 15.3 ± 0.4 | 14.2 ± 0.2 |
| 102 |                 | <i>Cassia tora</i> L.                                        | Sickle Senna                   | seed               | 13.2 ± 0.5 | 14.6 ± 0.3 |
| 103 |                 | <i>Dalbergia odorifera</i> T.C.Chen                          | Fragrant rosewood              | heart wood & trunk | 19.3 ± 0.4 | 21.1 ± 0.2 |
| 104 |                 | <i>Erythrina variegata</i> var. <i>orientalis</i> (L.) Merr. | Tiger's claw                   | bark               | 11.5 ± 0.4 | 11.6 ± 0.1 |

|     |                 |                                                                   |                          |                |            |            |
|-----|-----------------|-------------------------------------------------------------------|--------------------------|----------------|------------|------------|
| 105 |                 | <i>Flemingia prostrata</i> Roxb.f. ex Roxb.                       | Philippine flemingia     | root           | 12.4 ± 0.2 | 13.5 ± 0.2 |
| 106 |                 |                                                                   |                          | fruit          | 13.2 ± 0.1 | 9.9 ± 0.4  |
| 107 |                 | <i>Gleditsia sinensis</i> Lam.                                    | Chinese honey locust     | branch         | 16.4 ± 0.3 | 13.9 ± 0.2 |
| 108 |                 | <i>Glycine max</i> (L.) Merr.                                     | Soya bean                | seed           | 11.4 ± 0.2 | NIZ        |
| 109 |                 | <i>Glycyrrhiza uralensis</i> Fisch.                               | Licorice                 | rhizome & root | 14.3 ± 0.3 | 14.1 ± 0.1 |
| 110 |                 | <i>Lablab purpureus</i> (L.) Sweet                                | Lablab Bean              | seed           | 20.4 ± 0.2 | 15 ± 0.2   |
| 111 |                 | <i>Mimosa pudica</i> L.                                           | Sensitive grass          | aerial part    | 13.1 ± 0.2 | 11.6 ± 0.4 |
| 112 |                 | <i>Quercus infectoria</i> Oliv.                                   | Aleppo oak               | gall           | 24 ± 2     | 21 ± 1     |
| 113 |                 | <i>Sophora alopecuroides</i> L.                                   | Foxtail-like sophora     | seed           | 8.3 ± 0.2  | 8.3 ± 0.5  |
| 114 |                 | <i>Sophora tonkinensis</i> Gagnepain                              | Vietnamese sophora       | rhizome & root | 14.8 ± 0.3 | 12.8       |
| 115 |                 | <i>Spatholobus suberectus</i> Dunn                                | Caulis spatholobi        | stem           | 21.2       | 21.6 ± 0.6 |
| 116 | Ganodermataceae | <i>Ganoderma lucidum</i> (Curtis) P.Karst.                        | Reishi mushroom          | whole mushroom | 9.5        | 11.3 ± 0.5 |
| 117 | Gelsemiaceae    | <i>Gelsemium elegans</i> Benth.                                   | Graceful jessamine       | root           | 8.3 ± 0.1  | NIZ        |
| 118 |                 | <i>Gentiana macrophylla</i> Pall.                                 | Large-leaf gentian       | root           | 8.8 ± 0.6  | 8.2 ± 0.21 |
| 119 | Gentianaceae    | <i>Gentiana scabra</i> Bunge                                      | Scabrous gentian         | rhizome & root | NIZ        | NIZ        |
| 120 |                 | <i>Tripterospermum affine</i> (Wall. ex C.B.Cl.) H.Smith          | Herba tripterospermum    | aerial part    | 8.4 ± 0.2  | 8.3 ± 0.2  |
| 121 | Ginkgoaceae     | <i>Ginkgo biloba</i> L.                                           | Ginkgo                   | seed           | 8.1 ± 0.5  | NIZ        |
| 122 | Hypericaceae    | <i>Hypericum japonicum</i> Thunb.                                 | Matted St. John's-wort   | aerial part    | 21.1 ± 0.3 | 18.8 ± 0.3 |
| 123 | Hypoxidaceae    | <i>Curculigo orchioides</i> Gaertn.                               | Golden eye-grass         | rhizome        | 13.3 ± 0.1 | 10.9 ± 0.5 |
| 124 |                 | <i>Clerodendrum bungei</i> Steud.                                 | Glory-flower             | aerial part    | 10.1 ± 0.2 | 9.9 ± 0.1  |
| 125 |                 | <i>Glechoma longituba</i> (Nakai) Kuprian.                        | Longtube ground ivy herb | aerial part    | 10.8 ± 0   | 11 ± 0.1   |
| 126 |                 | <i>Isodon serra</i> Kudo                                          | Herba rabdosiae          | aerial part    | 19.1 ± 0.3 | 16.5 ± 0.3 |
| 127 |                 | <i>Leonurus japonicus</i> Houtt.                                  | Chinese motherwort       | aerial part    | 12.7 ± 0.4 | 10.3 ± 0.2 |
| 128 |                 | <i>Lycopus lucidus</i> var. <i>hirtus</i> (Regel) Makino & Nemoto | Herba lycopi             | aerial part    | 10 ± 0.1   | 9.4 ± 0.2  |
| 129 |                 | <i>Mentha haplocalyx</i> Briq.                                    | Chinese mint             | aerial part    | 10.1 ± 0.2 | 8.3        |
| 130 | Lamiaceae       | <i>Mosla chinensis</i> Maxim.                                     | Chinese mosla            | aerial part    | 11.7 ± 0.2 | 11.6 ± 0.7 |
| 131 |                 | <i>Perilla frutescens</i> Britton.                                | Beefsteak mint           | leaf           | 13.7 ± 0.5 | 10.5 ± 0.1 |
| 132 |                 | <i>Rabdosia rubescens</i> (Hemsl.) H.Hara                         | Blushred rabdosia        | aerial part    | 22.2 ± 0.1 | 21 ± 1     |
| 133 |                 | <i>Salvia miltiorrhiza</i> Bunge                                  | Chinese salvia           | rhizome & root | 25.7 ± 0.7 | 20.9 ± 0.2 |
| 134 |                 | <i>Schizonepeta tenuifolia</i> (Benth.) Briq.                     | Herba schizonepetae      | aerial part    | 10 ± 0.3   | 8.8 ± 0.4  |
| 135 |                 | <i>Thymus serpyllum</i> L.                                        | Brecklan thyme           | seed           | NIZ        | 8.13 ± 0.3 |
| 136 |                 | <i>Vitex negundo</i> L.                                           | Chinese chastetree       | fruit          | 8.5 ± 0.2  | 8.5 ± 0.5  |
| 137 |                 | <i>Vitex trifolia</i> L.                                          | Indian wild pepper       | fruit          | 12.6 ± 0.1 | 12.4 ± 0.3 |
| 138 | Lardizabalaceae | <i>Akebia quinata</i> Decne.                                      | Fiveleaf                 | stem           | 8.8 ± 0.1  | NIZ        |
| 139 |                 | <i>Sargentodoxa cuneata</i> Rehder & E.H.Wilson                   | Sargentgloryvine         | stem           | 17.9 ± 0.3 | 16.3       |
| 140 | Lauraceae       | <i>Cinnamomum cassia</i> (L.) Presl                               | Grey bollywood           | branch         | 15 ± 0.5   | 11.2 ± 0.2 |
| 141 |                 | <i>Lindera aggregata</i> (Sims) Kosterm.                          | Combined spicebush       | tuberous root  | 13.3 ± 0.4 | 9.8 ± 0.1  |

|     |                |                                                  |                             |                  |            |            |
|-----|----------------|--------------------------------------------------|-----------------------------|------------------|------------|------------|
| 142 |                | <i>Litsea cubeba</i> Pers.                       | Mountain-pepper             | fruit            | NIZ        | NIZ        |
| 143 |                | <i>Fritillaria cirrhosa</i> D. Don               | Sichuan fritillary          | Bulb             | NIZ        | NIZ        |
| 144 | Liliaceae      | <i>Fritillaria thunbergii</i> Miq.               | Fritillary                  | Bulb             | NIZ        | 9.1 ± 0.5  |
| 145 |                | <i>Fritillaria usuriensis</i> Maxim.             | Unibract fritillary         | bulb & rhizome   | NIZ        | NIZ        |
| 146 | Lindsaeaceae   | <i>Stenoloma chusanum</i> (L.) Ching             | Common wedgelet fern        | aerial part      | 13.9 ± 0.3 | 12.6 ± 0.2 |
| 147 |                | <i>Calvatia lilacina</i> (Mont. & Berk.) Lloyd   | Lasiosphaera seu calvatia   | whole mushroom   | 8.2 ± 0.4  | 8.2 ± 0.2  |
| 148 | Lycoperdaceae  | <i>Diphasiastrum complanatum</i> (L.) Holub      | Groundcedar                 | aerial part      | 22.7 ± 0.4 | 17.6 ± 0.1 |
| 149 | Lygodiaceae    | <i>Lygodium japonicum</i> (Thunb.) Sw.           | Japanese climbing fern      | spore            | 8.3 ± 0.3  | NIZ        |
| 150 | Lythraceae     | <i>Punica granatum</i> L.                        | Pomegranate                 | fruit peel       | 13.1 ± 0.4 | 13.7 ± 0.5 |
| 151 | Magnoliaceae   | <i>Magnolia denudata</i> Desr.                   | Lilytree                    | bud of flower    | 10.5 ± 0.2 | 14.8 ± 0.1 |
| 152 |                | <i>Abutilon indicum</i> (L.) Sweet               | Indian abutilon             | aerial part      | NIZ        | 8.4 ± 0.3  |
| 153 |                | <i>Bombax malabaricum</i> DC.                    | Bombax                      | root bark        | 16.2 ± 0.3 | 11.5 ± 0.2 |
| 154 |                | <i>Helicteres angustifolia</i> L.                | Narrowleaf screwtree        | root             | 18.4       | 17.5 ± 0.1 |
| 155 | Malvaceae      | <i>Pterospermum heterophyllum</i> Hance          | Heterophyllous wingseedtree | root             | 18.7       | 17 ± 0.1   |
| 156 |                | <i>Sterculia lychnophora</i> Hance               | Boat-fruited sterculia      | reed             | 11.8 ± 0.1 | 10.2 ± 0.4 |
| 157 |                | <i>Urena lobata</i> L.                           | Caesar weed                 | aerial part      | 9.3 ± 0.5  | 8.5 ± 0.2  |
| 158 | Melanthiaceae  | <i>Paris polyphylla</i> Sm.                      | Rhizoma paridis             | rhizome          | NIZ        | NIZ        |
| 159 |                | <i>Melia azedarach</i> L.                        | Chinaberry tree             | bark & root bark | 21.1 ± 0.3 | 18.1 ± 0.3 |
| 160 | Meliaceae      | <i>Melia toosendan</i> Sieb.&Zucc.               | Cape-lilac                  | fruit            | NIZ        | 8.3 ± 0.2  |
| 161 |                | <i>Stephania delavayi</i> Diels                  | Epigeal Srephaia            | tuberous root    | 10.5 ± 0.1 | 9 ± 0.5    |
| 162 | Menispermaceae | <i>Stephania tetrandra</i> S.Moore               | Stephania root              | root             | 10.6 ± 0.6 | 12.9 ± 0.4 |
| 163 |                | <i>Tinospora capillipes</i> Gagnep.              | Arrowshaped tinospora       | tuberous root    | 9.0 ± 0.2  | 8.3 ± 0.2  |
| 164 |                | <i>Broussonetia papyrifera</i> Vent.             | Paper mulberry              | fruit            | 8.2 ± 0.1  | NIZ        |
| 165 | Moraceae       | <i>Morus alba</i> L.                             | White mulberry              | fruit            | NIZ        | NIZ        |
| 166 | Myristicaceae  | <i>Myristica fragrans</i> Houtt.                 | Mace                        | seed             | 9.2 ± 0.2  | 9.9 ± 0.1  |
| 167 |                | <i>Forsythia suspensa</i> Vahl                   | Forsythia                   | fruit            | 12.9 ± 0.3 | 9.4 ± 0.6  |
| 168 | Oleaceae       | <i>Fraxinus fallax</i> Lingelsh.                 | Largeleaf chinese ash       | bark             | 16.8 ± 0.3 | 21 ± 1     |
| 169 |                | <i>Jasminum nudiflorum</i> Lindl.                | Winter jasmine              | bud of flower    | 14.4 ± 0.2 | 12.8 ± 0.3 |
| 170 |                | <i>Bletilla striata</i> Rchb.f.                  | Chinese ground orchid       | tuberous root    | 8.3 ± 0.1  | 8.9 ± 0.1  |
| 171 | Orchidaceae    | <i>Cremastra appendiculata</i> (D.Don) Makino    | Pseudobulbus cremastrae     | bulb             | 12 ± 0.3   | 11.3 ± 0.2 |
| 172 |                | <i>Nervilia fordii</i> Schltr.                   | Ford nervilla               | rhizome and leaf | 14.7 ± 0.5 | 9.25       |
| 173 |                | <i>Pholidota chinensis</i> Lindl.                | Chinese Photinia herb       | stem             | 17.5 ± 0.2 | 18.5 ± 0.1 |
| 174 |                | <i>Cistanche deserticola</i> Y.C.Ma              | Desert-broomrape            | succulent stem   | 9.2 ± 0.4  | 9.2 ± 0.2  |
| 175 | Orobanchaceae  | <i>Phtheirospermum japonicum</i> (Thunb.) Kanitz | Capillary wormwood herb     | aerial part      | NIZ        | 10.8 ± 0.5 |
| 176 |                | <i>Rehmannia glutinosa</i> (Gaertn.) Libosch.    | Radix rehmanniae preparta   | tuberous root    | NIZ        | NIZ        |
| 177 |                | <i>Striga asiatica</i> (L.) Kuntze               | Asiatic witchweed           | aerial part      | 14.6 ± 0.3 | 12.9 ± 0.2 |
| 178 | Paeoniaceae    | <i>Paeonia lactiflora</i> Pall.                  | Chinese peony               | root             | 18.6 ± 0.1 | 15.9 ± 0.5 |

|     |                |                                                                |                               |                |            |            |
|-----|----------------|----------------------------------------------------------------|-------------------------------|----------------|------------|------------|
| 179 |                | <i>Paeonia suffruticosa</i> Andrews                            | Moutan peony                  | root bark      | 18 ± 0.2   | 17 ± 1     |
| 180 |                | <i>Paeonia veitchii</i> Lynch                                  | Red Peony                     | root           | 19.1 ± 0.2 | 17.3 ± 0.3 |
| 181 | Papaveraceae   | <i>Corydalis decumbens</i> Pers.                               | Rhizoma corydalis decumbentis | rhizome        | NIZ        | 8.4 ± 0.3  |
| 182 | Phyllanthaceae | <i>Phyllanthus emblica</i> L.                                  | Emblic                        | fruit          | 20 ± 0.1   | 17 ± 1     |
| 183 | Pinaceae       | <i>Pseudolarix amabilis</i> Rehder                             | Chinese golden larch          | root bark      | 17.5 ± 0.4 | 15.3 ± 0.1 |
| 184 | Piperaceae     | <i>Piper wallichii</i> Hand.-Mazz.                             | Angiosperms                   | leaf and stem  | 8.28 ± 0.1 | 9.1 ± 0.3  |
| 185 |                | <i>Bambusa tuldooides</i> Munro                                | Puntingpole bamboo            | stem           | 14.2 ± 0.3 | 12.6       |
| 186 |                | <i>Chrysopogon aciculatus</i> Trin.                            | Mackie's pest                 | aerial part    | 15.3 ± 0.1 | 9.4        |
| 187 | Poaceae        | <i>Coix lacryma-jobi</i> L.                                    | Adlay                         | seed           | 8.1 ± 0.1  | 8.6 ± 0.3  |
| 188 |                | <i>Cymbopogon distans</i> (Nees ex Steud.) Will.Watson         | Remote Lemongrass             | aerial part    | 13.2       | 11.3 ± 0.3 |
| 189 |                | <i>Phragmites communis</i> Trin.                               | European reed                 | rhizome        | 10.4 ± 0.3 | 8.4 ± 0.2  |
| 190 |                | <i>Polygala japonica</i> Houutt.                               | Japanese milkwort             | aerial part    | NIZ        | 8.6 ± 0.6  |
| 191 | Polygalaceae   | <i>Poria cocos</i> F.A.Wolf                                    | Indian buead                  | sclerotium     | NIZ        | NIZ        |
| 192 |                | <i>Polygonum bistorta</i> L.                                   | Meadow bistort                | rhizome        | 17.2 ± 0.2 | 16 ± 1     |
| 193 |                | <i>Polygonum chinense</i> L.                                   | Chinese knotweed              | aerial part    | 17.2 ± 0.5 | 13         |
| 194 | Polygonaceae   | <i>Polygonum multiflorum</i> Thunb.                            | Tuber fleecflower             | stem           | 18.2 ± 0.5 | 15.5 ± 0.3 |
| 195 |                |                                                                |                               | tuberous root  | 16.2 ± 0.4 | 12.6 ± 0.1 |
| 196 |                | <i>Rumex obtusifolius</i> L.                                   | Bitter dock                   | root           | 14.7 ± 0.7 | 13 ± 0.5   |
| 197 |                | <i>Ardisia japonica</i> Blume                                  | Marlberry                     | aerial part    | 14.3       | 13.4       |
| 198 | Primulaceae    | <i>Lysimachia christinae</i> Hance                             | Herba lysimachiae             | aerial part    | 17.6 ± 0.4 | 12.1 ± 0.3 |
| 199 |                | <i>Cimicifuga foetida</i> L.                                   | Chinese cimicifuga            | rhizome        | 9 ± 0.3    | 9.9 ± 0.2  |
| 200 | Ranunculaceae  | <i>Coptis chinensis</i> Franch.                                | Chinese goldthread            | rhizome        | 21.7 ± 0.5 | 27 ± 1     |
| 201 |                | <i>Thalictrum aquilegifolium</i> L.                            | French meadow-rue             | rhizome & root | 12.7       | 17.8 ± 0.2 |
| 202 |                | <i>Agrimonia pilosa</i> Ledeb.                                 | Herba agrimoniae              | aerial part    | 20 ± 1     | 19 ± 1     |
| 203 |                | <i>Duchesnea indica</i> (Andr.) Focke                          | Indian strawberry             | aerial part    | 15.2 ± 0.4 | 11 ± 0.3   |
| 204 |                | <i>Eriobotrya japonica</i> (Thunb.) Lindl.                     | Japanese medlar               | leaf           | 12.1 ± 0.4 | 10.6 ± 0.1 |
| 205 | Rosaceae       | <i>Geum aleppicum</i> Jacq.                                    | Aleppo avens                  | aerial part    | 18 ± 0.4   | 13.5 ± 0.2 |
| 206 |                | <i>Prunus mume</i> Siebold & Zucc .                            | Japanese apricot              | fruit          | 14.6 ± 0.1 | 13.8 ± 0.1 |
| 207 |                | <i>Rosa laevigata</i> Michx.                                   | Cherokee rose                 | fruit          | 11.4 ± 0.5 | 10.4 ± 0.4 |
| 208 |                | <i>Gardenia jasminoides</i> Ellis                              | Cape jasmine                  | fruit          | 9.1 ± 0.4  | NIZ        |
| 209 |                | <i>Morinda officinalis</i> F.C.How                             | Indian mulberry               | root           | 8.1 ± 0.2  | 8.5 ± 0.1  |
| 210 | Rubiaceae      | <i>Serissa serissoides</i> (DC.) Druce                         | Snowrose                      | aerial part    | 14.5 ± 0.4 | 15.7 ± 0.1 |
| 211 |                | <i>Uncaria sinensis</i> Havil.                                 | Gambir plant                  | branch         | 13.2 ± 0.5 | 11.7 ± 0.2 |
| 212 |                | <i>Citrus medica</i> var. <i>sarcodactylis</i> (Noot.) Swingle | flesh-finger citron           | fruit          | 8.3 ± 0.1  | 8.4 ± 0.5  |
| 213 | Rutaceae       | <i>Citrus reticulata</i> Blanco                                | Mandarin                      | fruit peel     | NIZ        | NIZ        |
| 214 |                | <i>Dictamnus dasycarpus</i> Turcz.                             | Dense-fruit dittany           | root bark      | 8.6 ± 0.1  | 8.2 ± 0.2  |

|     |               |                                                     |                              |               |            |            |
|-----|---------------|-----------------------------------------------------|------------------------------|---------------|------------|------------|
| 215 |               | <i>Evodia lepta</i> (Spreng.) Merr.                 | Thin evodia twig and leaf    | root          | 10.6 ± 0.3 | 10 ± 1     |
| 216 |               | <i>Evodia ruticarpa</i> (A.Juss.) Hook.f. & Thomson | Evodia                       | fruit         | 11.7 ± 0.2 | 10.4 ± 0.4 |
| 217 |               | <i>Phellodendron chinense</i> C.K.Schneid.          | Chinese corktree             | bark          | 18.1 ± 0.2 | 23.2 ± 0.6 |
| 218 |               | <i>Zanthoxylum nitidum</i> DC.                      | Shiny-leaf prickly-ash       | root          | 13.8       | 15.8       |
| 219 |               | <i>Thesium chinense</i> Turcz.                      | Chinese bastardtoadflax herb | aerial part   | 8.2 ± 0.2  | 10 ± 0.1   |
| 220 | Santalaceae   | <i>Viscum coloratum</i> Nakai                       | Herba visci                  | leaf & branch | 8.7 ± 0.2  | 8.1 ± 0.2  |
| 221 | Sapindaceae   | <i>Dimocarpus longan</i> Lour.                      | Longan                       | seed coat     | 8.1        | 8.3 ± 0.1  |
| 222 | Saururaceae   | <i>Saururus chinensis</i> (Lour.) Baill.            | Chinese lizardtail           | aerial part   | 8.4 ± 0.4  | 9.9 ± 0.6  |
| 223 | Saxifragaceae | <i>Saxifraga stolonifera</i> Meerb.                 | Creeping saxifrage           | aerial part   | 15 ± 0.2   | 10.6 ± 0.2 |
| 224 | Simaroubaceae | <i>Brucea javanica</i> (L.) Merr.                   | Java brucea                  | fruit         | 8.5 ± 0.3  | 8.7 ± 0.2  |
| 225 |               | <i>Datura stramonium</i> L.                         | Jamestown weed               | flower        | 10.3 ± 0.8 | 10.7 ± 0.6 |
| 226 |               | <i>Lycium barbarum</i> L.                           | Chinese boxthorn             | fruit         | NIZ        | NIZ        |
| 227 | Solanaceae    | <i>Lycium chinense</i> Mill.                        | Chinese boxthorn             | Root bark     | 16.8 ± 0.3 | 13.6       |
| 228 |               | <i>Solanum lyratum</i> Thunb.                       | Herba solani lyrati          | aerial part   | 9 ± 0.3    | 8.6 ± 0.3  |
| 229 | Stemonaceae   | <i>Stemona sessilifolia</i> (Miq.) Miq.             | Stemona                      | root          | NIZ        | 8.3 ± 0.1  |
| 230 | Tamaricaceae  | <i>Tamarix chinensis</i> Lour.                      | China tamarisk               | branch & leaf | 16.3 ± 0.1 | 16.5 ± 0.3 |
| 231 |               | <i>Daphne genkwa</i> Siebold & Zucc.                | Chinese daphne               | bud of flower | 20.3 ± 0.5 | 16.8 ± 0.2 |
| 232 | Thymelaeaceae | <i>Wikstroemia indica</i> C.A.Mey.                  | Tiebush                      | root          | 13 ± 0.4   | 13 ± 1     |
| 233 |               | <i>Sparganium stoloniferum</i> Buch.-Ham.           | Common burreed               | tuberous root | 9.3 ± 0.2  | NIZ        |
| 234 | Typhaceae     | <i>Typha angustifolia</i> L.                        | Cattail                      | pollen        | 8.5 ± 0.4  | NIZ        |
| 235 | Verbenaceae   | <i>Verbena officinalis</i> L.                       | Common verbena               | aerial part   | 11.9 ± 0.1 | 11.9 ± 0.3 |
| 236 | Vitaceae      | <i>Ampelopsis japonica</i> Makino                   | Japanese peppervine          | tuberous root | 12.1 ± 0.4 | 10.6 ± 0.1 |
| 237 |               | <i>Parthenocissus tricuspidata</i> Planch.          | Japanese-creeper             | root & stem   | 8.3        | 8.2 ± 0.1  |
| 238 |               | <i>Curcuma longa</i> L.                             | Common turmeric              | rhizome       | 8.2 ± 0.2  | 8.6 ± 0.1  |
| 239 | Zingiberaceae | <i>Curcuma phaeocaulis</i> Valetton                 | Rhizoma zedoariae            | rhizome       | 18.5 ± 0.6 | 12.9 ± 0.4 |
|     | Ampicillin    |                                                     |                              |               | 34.6 ± 0.3 | 20.8 ± 0.7 |
|     | Oxacillin     |                                                     |                              |               | 17.0 ± 0.5 | 12.9 ± 0.4 |
|     | DMSO          |                                                     |                              |               | NIZ        | NIZ        |

Inhibitory effects of 239 TCMP extracts were determined by DIZ in triplicate. Value of DIZ was expressed as mean ± standard deviation (SD). DIZ values less than 8.0 mm was defined as no inhibition zone (NIZ). Ampicillin (32 µg/mL) and oxacillin (4 µg/mL) were used as positive controls, while DMSO was used as a negative control.

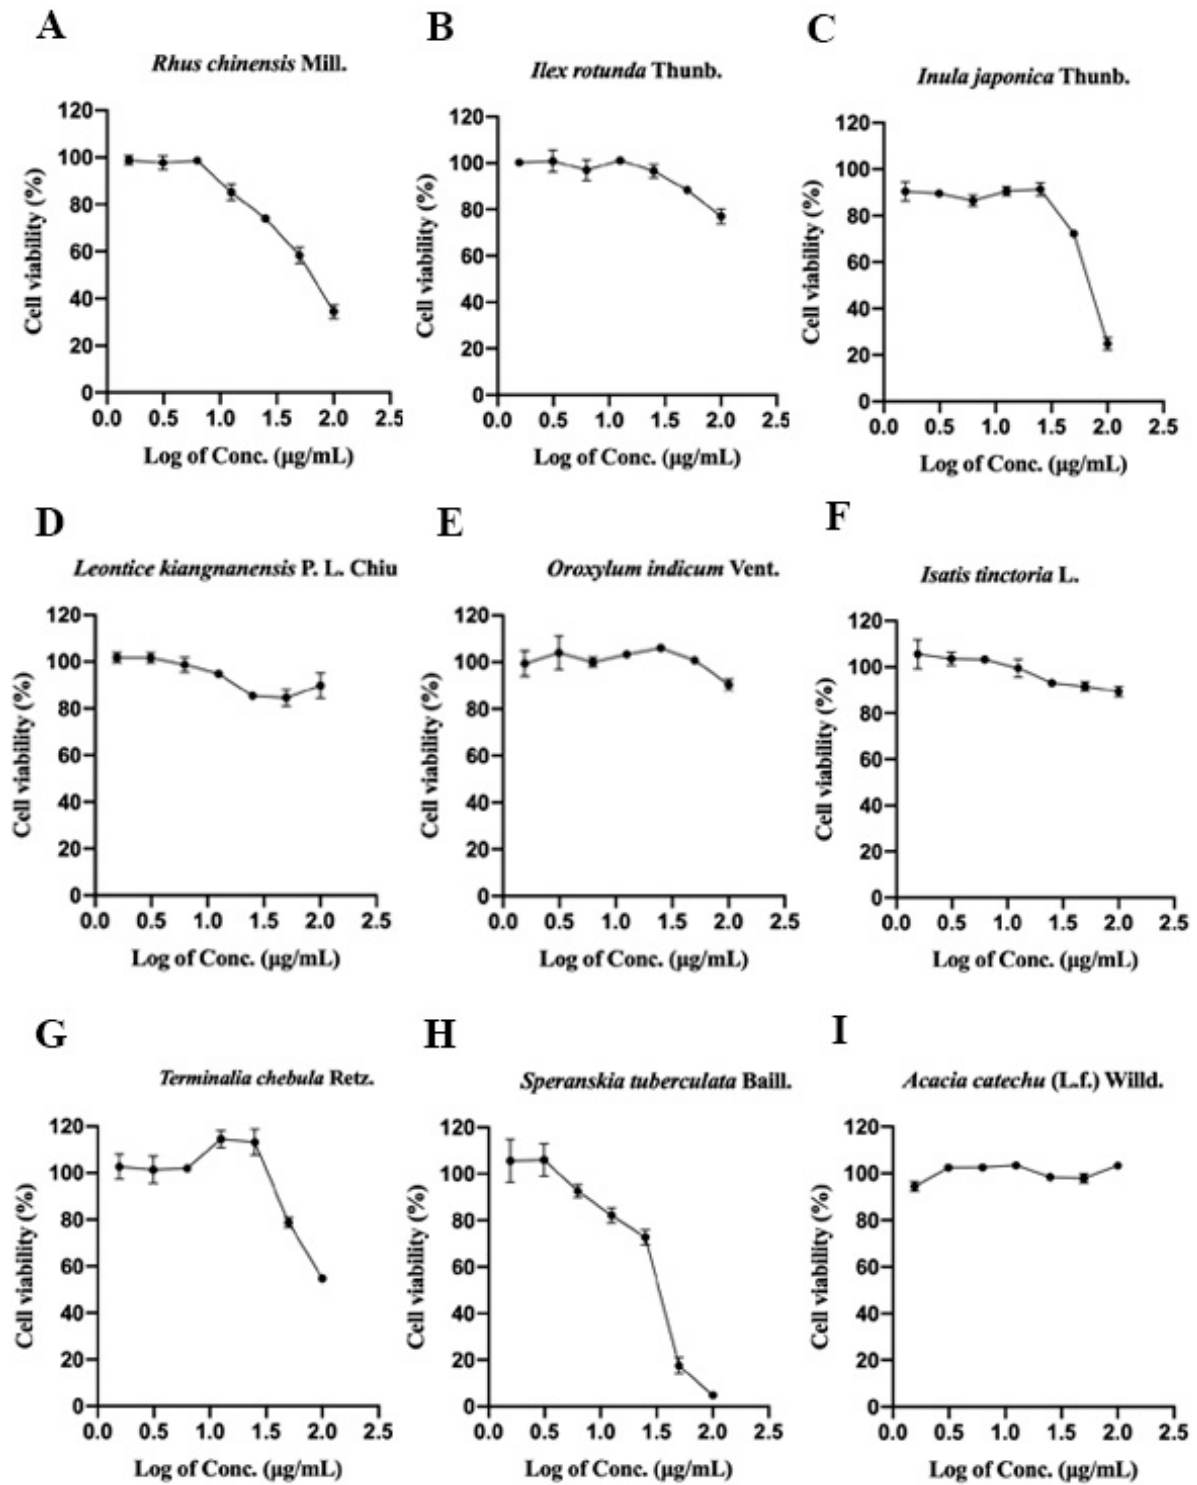



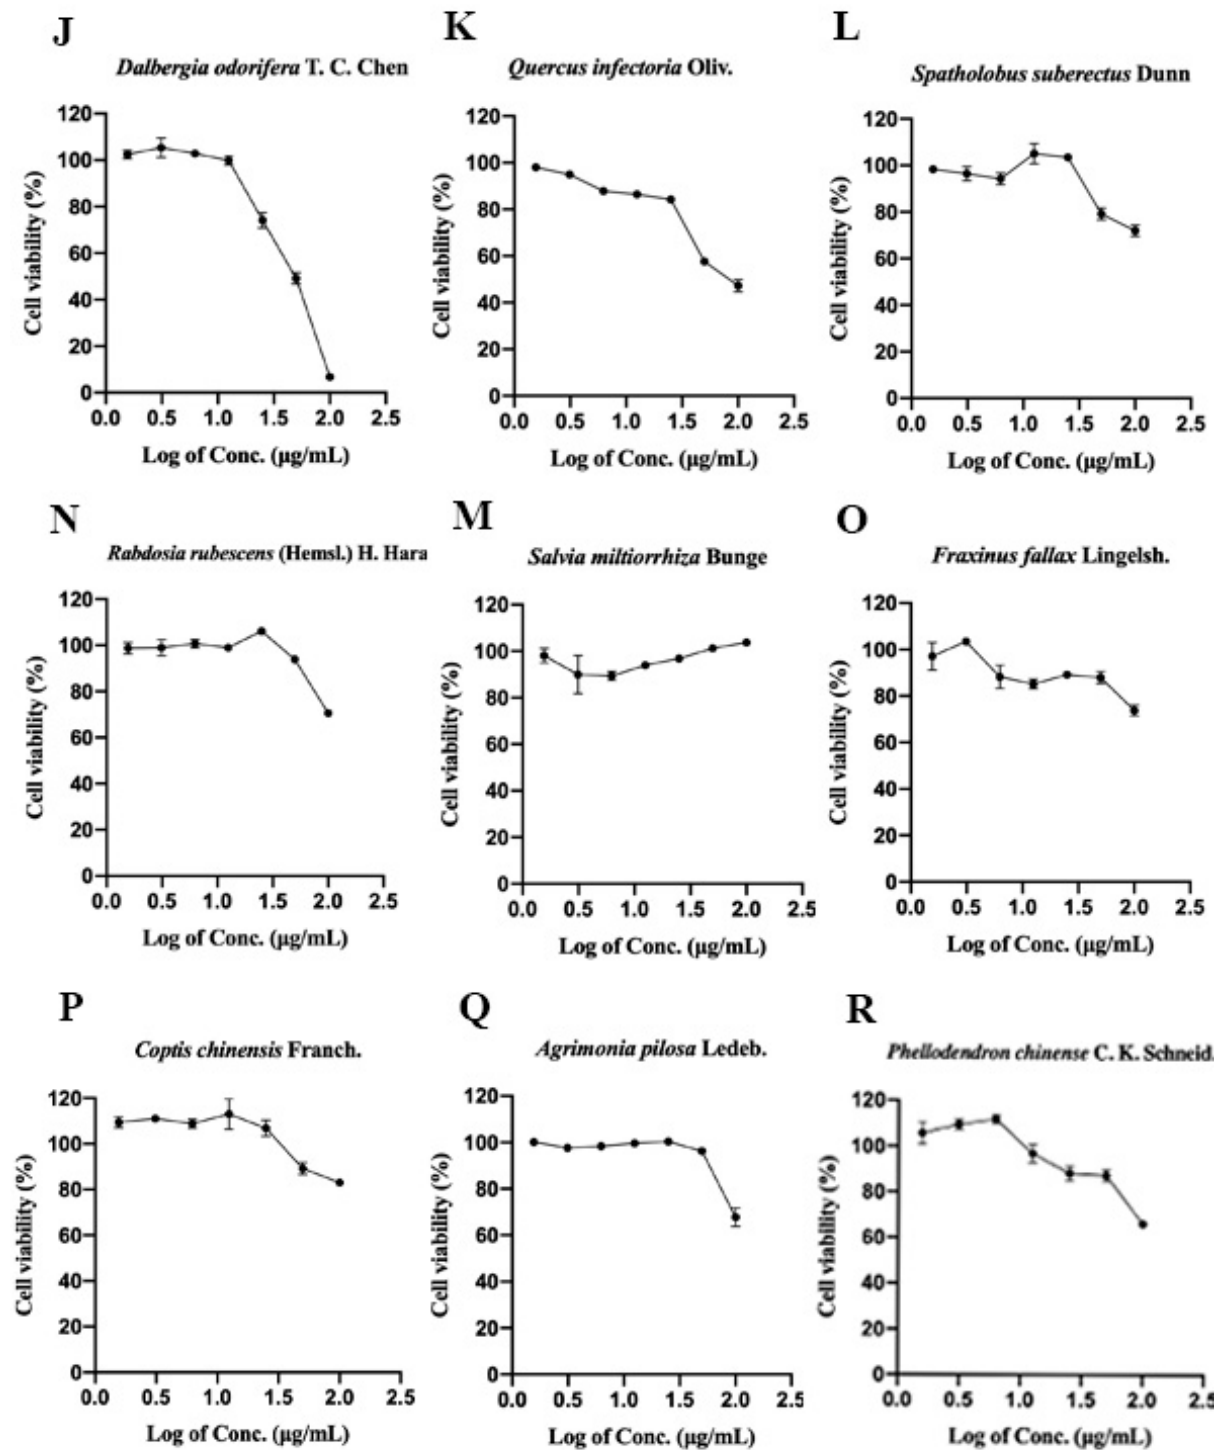

**Figure S1.** Dose-response curves for the cell viability in HFF cells exposed to TCMP extracts: (A) *R. chinensis*; (B) *I. rotunda*; (C) *I. japonica*; (D) *L. kiangnanensis*; (E) *O. indicum*; (F) *I. tinctoria*; (G) *T. chebula*; (H) *S. tuberculata*; (I) *A. catechu*; (J) *D. odorifera*; (K) *Q. infectoria*; (L) *S. suberectus*; (N) *R. rubescens*; (M) *S. miltiorrhiza*; (O) *F. fallax*; (P) *C. chinensis*; (Q) *A. Pilosa*; (R) *P. chinense*. The graphs represent the percentage of cell viability versus logarithm of the concentration.
